# Supplementary material for: Pharmacokinetics of Oral Cholecalciferol in Healthy Subjects with Vitamin D Deficiency: A Randomized Open-Label Study
Source: PubMed Central journal article supplement (PMC7352201; doi:10.3390/nu12061553), 2020-05-27
Supplement: nutrients-12-01553-s001.pdf [file nutrients-12-01553-s001.pdf]

**Supplementary Table S1.** Statistical analysis of pharmacokinetic parameters for 25(OH)D3 following repeated oral doses of cholecalciferol.

| Time          | 25(OH)D3 (ng/ml) | ALL subjects (n=73) | Group A (n=24)   | Group B (n=25)   | Group C (n=24)   | ANOVA p-value |
|---------------|------------------|---------------------|------------------|------------------|------------------|---------------|
| V2 - Baseline | N                | 73                  | 24               | 25               | 24               | 0.319         |
|               | Mean (SD)        | 13.5 (3.7)          | 14.4 (3.9)       | 12.8 (3)         | 13.4 (4.2)       |               |
|               | Median (IQR)     | 13.8 (11.5-16)      | 14.7 (12.4-16.6) | 12.6 (10.7-15.1) | 13.4 (10-16.8)   |               |
|               | Min-Max          | 5-21.9              | 7-21.9           | 5-18.4           | 5.9-19.8         |               |
| V3 – Day 7    | N                | 73                  | 24               | 25               | 24               | <0.001        |
|               | Mean (SD)        | 23.3 (4.4)          | 23.5 (3.6)       | 20.9 (3)         | 25.7 (5.2)       |               |
|               | Median (IQR)     | 22.7 (20.2-26.2)    | 22.9 (20.6-26.5) | 20.6 (19.2-22.8) | 25.9 (22.2-28.1) |               |
|               | Min-Max          | 14.2-35.6           | 14.2-29.6        | 15.3-26.4        | 14.7-35.6        |               |
| V4 – Day 14   | N                | 73                  | 24               | 25               | 24               | <0.001        |
|               | Mean (SD)        | 28.2 (5.4)          | 32.5 (5)         | 26.5 (3.4)       | 25.6 (4.9)       |               |
|               | Median (IQR)     | 28.4 (25.1-31)      | 32.2 (29.8-36.6) | 26.6 (25.1-29.3) | 24.8 (22.5-28.7) |               |
|               | Min-Max          | 17.2-40.4           | 20.5-40.4        | 18.9-31.8        | 17.2-34.7        |               |
| V5 – Day 21   | N                | 73                  | 24               | 25               | 24               | <0.001        |
|               | Mean (SD)        | 38 (9.2)            | 44.2 (10.9)      | 34.1 (5.3)       | 35.8 (7.6)       |               |
|               | Median (IQR)     | 36.5 (31.7-42.4)    | 42.6 (36-51.6)   | 34.2 (30.7-37.5) | 36.5 (30.4-40.1) |               |
|               | Min-Max          | 18.8-70             | 21-70            | 22.7-45.6        | 18.8-49.2        |               |
| V6 – Day 28   | N                | 73                  | 24               | 25               | 24               | <0.001        |
|               | Mean (SD)        | 43.6 (11.1)         | 55.2 (10.2)      | 38.9 (4.2)       | 36.9 (7.2)       |               |
|               | Median (IQR)     | 41.2 (36.1-48.8)    | 55.6 (47.6-62)   | 39.2 (36.4-41.2) | 36 (32.1-41.3)   |               |
|               | Min-Max          | 25.9-85.2           | 40.4-85.2        | 29.6-48.8        | 25.9-59.2        |               |
| V7 – Day 35   | N                | 73                  | 24               | 25               | 24               | <0.001        |
|               | Mean (SD)        | 49.9 (12.9)         | 62.6 (13)        | 43.6 (5.5)       | 43.8 (8.3)       |               |
|               | Median (IQR)     | 46.8 (40-56.8)      | 63.2 (54.7-71.8) | 43.6 (39.4-47.2) | 43.8 (39.4-47.8) |               |
|               | Min-Max          | 26.5-84             | 33.8-84          | 36.3-54.8        | 26.5-57.6        |               |
| V8 – Day 42   | N                | 73                  | 24               | 25               | 24               | <0.001        |
|               | Mean (SD)        | 54.6 (15.2)         | 71 (13.4)        | 49.4 (5.4)       | 43.5 (8.5)       |               |
|               | Median (IQR)     | 51.6 (44-62)        | 68.4 (62.5-80.1) | 49.2 (46-52.4)   | 43 (36.6-49)     |               |
|               | Min-Max          | 29.4-100.4          | 47.2-100.4       | 39-60            | 29.4-62          |               |
| V9 – Day 49   | N                | 73                  | 24               | 25               | 24               | <0.001        |
|               | Mean (SD)        | 56.3 (15)           | 72.4 (12.9)      | 51.1 (6.2)       | 45.7 (9)         |               |
|               | Median (IQR)     | 51.6 (46.8-65.2)    | 70.8 (61.9-79.8) | 50 (47.2-53.2)   | 45.6 (40-51.6)   |               |
|               | Min-Max          | 28-97.6             | 49.6-97.6        | 42-65.2          | 28-65.6          |               |
| V10 – Day 56  | N                | 73                  | 24               | 25               | 24               | <0.001        |
|               | Mean (SD)        | 59.6 (17.9)         | 79.1 (16.2)      | 53.5 (7.2)       | 46.4 (8.2)       |               |
|               | Median (IQR)     | 55.2 (47.2-68.4)    | 78.6 (67.8-92.3) | 52.8 (48.4-60)   | 47 (42.9-52.3)   |               |
|               | Min-Max          | 31-113.6            | 49.2-113.6       | 40.4-68.4        | 31-59.6          |               |
| V11 – Day 63  | N                | 73                  | 24               | 25               | 24               | <0.001        |
|               | Mean (SD)        | 57.7 (13.3)         | 70.8 (11.5)      | 52.8 (7)         | 49.8 (10.1)      |               |
|               | Median (IQR)     | 54.4 (49.2-66.8)    | 71.6 (61.7-79.6) | 51.6 (49.2-56.4) | 49.2 (45.1-55.6) |               |
|               | Min-Max          | 32.5-90.4           | 52-90.4          | 40.8-72.8        | 32.5-71.2        |               |
| V12 – Day 77  | N                | 73                  | 24               | 25               | 24               | 0.039         |
|               | Mean (SD)        | 56.5 (10.8)         | 60.8 (11.6)      | 55.5 (7.8)       | 53.1 (11.6)      |               |
|               | Median (IQR)     | 56 (48.8-63.2)      | 60.8 (53.3-70.2) | 55.2 (48.8-60.8) | 55 (43-60.2)     |               |
|               | Min-Max          | 35.7-79.6           | 39.9-79.6        | 43.2-71.2        | 35.7-77.2        |               |
| V13 – Day 84  | N                | 72                  | 24               | 24               | 24               | 0.014         |
|               | Mean (SD)        | 55.1 (10.2)         | 56.9 (10.7)      | 58.2 (9.2)       | 50.3 (9.3)       |               |
|               | Median (IQR)     | 53.8 (48.7-62.4)    | 54.8 (51.8-62.1) | 57.2 (50.8-66)   | 49.6 (43.3-57.4) |               |
|               | Min-Max          | 33.2-80             | 40-80            | 43.6-74.8        | 33.2-66.4        |               |
| V14 – Day 85  | N                | 67                  | 24               | 21               | 22               | 0.012         |
|               | Mean (SD)        | 55.3 (10.5)         | 57.3 (11.5)      | 58.6 (8.2)       | 49.9 (9.6)       |               |

|                   |                                           |                                                    |                                                    |                                                   |                                                    |       |
|-------------------|-------------------------------------------|----------------------------------------------------|----------------------------------------------------|---------------------------------------------------|----------------------------------------------------|-------|
|                   | Median (IQR)<br>Min-Max                   | 56.8 (48.6-61.4)<br>32.2-77.6                      | 57.2 (52.1-62.6)<br>32.2-77.6                      | 60 (53.2-64.8)<br>42.4-76.8                       | 49.2 (44.7-58.9)<br>33.7-64                        |       |
| V15 – Day 87      | N<br>Mean (SD)<br>Median (IQR)<br>Min-Max | 69<br>52.1 (10.1)<br>53.2 (46-58)<br>27.4-78.8     | 24<br>53.6 (11.5)<br>52.6 (47.6-57.8)<br>27.4-78.8 | 23<br>55.4 (6.6)<br>56 (52.8-59.4)<br>42.4-68.4   | 22<br>47 (10)<br>46.2 (40.9-53.2)<br>29-70         | 0.012 |
| V16 - Day 89      | N<br>Mean (SD)<br>Median (IQR)<br>Min-Max | 69<br>49.7 (9.6)<br>49.6 (41.6-56.4)<br>30.6-69.6  | 24<br>49.9 (8.7)<br>50.6 (43.4-55.4)<br>34.7-68.4  | 23<br>54.1 (9.5)<br>53.2 (49.6-60)<br>30.6-69.6   | 22<br>45 (8.9)<br>45.2 (37.4-51)<br>33.8-63.2      | 0.006 |
| V17 - Day 96      | N<br>Mean (SD)<br>Median (IQR)<br>Min-Max | 69<br>49.7 (11.2)<br>48.8 (41.2-55.2)<br>30.8-89.5 | 24<br>49.2 (9.7)<br>50.8 (41.2-55.6)<br>30.8-70    | 23<br>53 (10)<br>50.8 (47.6-55.2)<br>37.4-76.8    | 22<br>46.9 (13.2)<br>44.2 (39.4-49.4)<br>32.2-89.5 | 0.184 |
| V18* Day 103      | N<br>Mean (SD)<br>Median (IQR)<br>Min-Max | 69<br>41.1 (9.4)<br>40.4 (34.3-47.2)<br>25.6-68    | 24<br>41.1 (8.1)<br>41 (35.3-46.3)<br>25.6-58.8    | 23<br>44.3 (10.5)<br>40.8 (36.2-51.6)<br>27-68    | 22<br>37.8 (8.8)<br>35.9 (30.7-40.8)<br>25.6-60.4  | 0.065 |
| V19* - Day<br>112 | N<br>Mean (SD)<br>Median (IQR)<br>Min-Max | 69<br>43.5 (8.1)<br>42.4 (37.5-49.6)<br>27.6-64.4  | 24<br>44.4 (9.1)<br>42.6 (37.5-50.3)<br>31.6-64.4  | 23<br>45.3 (7.5)<br>44.4 (38.8-49.6)<br>34.4-61.6 | 22<br>40.8 (7.1)<br>39.4 (36-43.3)<br>27.6-56      | 0.15  |

**Supplementary Table S2.** Subjects with 25(OH)D levels  $\geq 20$  ng/mL and  $\geq 30$  ng/mL on Day 7, 14, 21, 28, 35, 42, 49, 56, 63, 77, 84, 85, 87, 89, 96, 103, 112.

| Levels                                                       | ALL subjects (n=71) | Group A (n=24)  | Group B (n=23)  | Group C (n=24)  |
|--------------------------------------------------------------|---------------------|-----------------|-----------------|-----------------|
| <b><math>\geq 20</math>ng/mL</b>                             |                     |                 |                 |                 |
| Number of subjects with 25-OH-D <20ng/ml at baseline         | 69                  | 22              | 23              | 24              |
| Number of subjects with 25-OH-D $\geq 20$ ng/ml on Day 7     | 55/69 (79.7%)       | 19/22 (86.3%)   | 15/23 (65.2%)   | 21/24 (87.5%)   |
| Number of subjects with 25-OH-D $\geq 20$ ng/ml on Day 14    | 65/69 (94.2%)       | 22/22 (100%)    | 22/23 (95.6%)   | 21/24 (87.5%)   |
| Number of subjects with 25-OH-D $\geq 20$ ng/ml on Day 21    | 68/69 (98.6%)       | 22/22 (100%)    | 23/23 (100%)    | 23/24 (95.8%)   |
| Number of subjects with 25-OH-D $\geq 20$ ng/ml on Day 28    | 69/69 (100%)        | 22/22 (100%)    | 23/23 (100%)    | 24/24 (100%)    |
| Number of subjects with 25-OH-D $\geq 20$ ng/ml on Day 35    | 69/69 (100%)        | 22/22 (100%)    | 23/23 (100%)    | 24/24 (100%)    |
| Number of subjects with 25-OH-D $\geq 20$ ng/ml on Day 42    | 69/69 (100%)        | 22/22 (100%)    | 23/23 (100%)    | 24/24 (100%)    |
| Number of subjects with 25-OH-D $\geq 20$ ng/ml on Day 49    | 69/69 (100%)        | 22/22 (100%)    | 23/23 (100%)    | 24/24 (100%)    |
| Number of subjects with 25-OH-D $\geq 20$ ng/ml on Day 56    | 69/69 (100%)        | 22/22 (100%)    | 23/23 (100%)    | 24/24 (100%)    |
| Number of subjects with 25-OH-D $\geq 20$ ng/ml on Day 63    | 69/69 (100%)        | 22/22 (100%)    | 23/23 (100%)    | 24/24 (100%)    |
| Number of subjects with 25-OH-D $\geq 20$ ng/ml on Day 77    | 69/69 (100%)        | 22/22 (100%)    | 23/23 (100%)    | 24/24 (100%)    |
| Number of subjects with 25-OH-D $\geq 20$ ng/ml on Day 84    | 69/69 (100%)        | 22/22 (100%)    | 23/23 (100%)    | 24/24 (100%)    |
| Number of subjects with 25-OH-D $\geq 20$ ng/ml on Day 85*   | 65/65 (100%)*       | 22/22 (100%)*   | 21/21 (100%)*   | 22/22 (100%)*   |
| Number of subjects with 25-OH-D $\geq 20$ ng/ml on Day 87*   | 65/65 (100%)*       | 22/22 (100%)*   | 21/21 (100%)*   | 22/22 (100%)*   |
| Number of subjects with 25-OH-D $\geq 20$ ng/ml on Day 89*   | 65/65 (100%)*       | 22/22 (100%)*   | 21/21 (100%)*   | 22/22 (100%)*   |
| Number of subjects with 25-OH-D $\geq 20$ ng/ml on Day 96*   | 65/65 (100%)*       | 22/22 (100%)*   | 21/21 (100%)*   | 22/22 (100%)*   |
| Number of subjects with 25-OH-D $\geq 20$ ng/ml on Day 103*  | 65/65 (100%)*       | 22/22 (100%)*   | 21/21 (100%)*   | 22/22 (100%)*   |
| Number of subjects with 25-OH-D $\geq 20$ ng/ml on Day 112*  | 65/65 (100%)*       | 22/22 (100%)*   | 21/21 (100%)*   | 22/22 (100%)*   |
| <b><math>\geq 30</math>ng/mL</b>                             |                     |                 |                 |                 |
| Number of subjects with 25-OH-D <30ng/ml at baseline         | 71                  | 24              | 23              | 24              |
| Number of subjects with 25-OH-D $\geq 30$ ng/ml on Day 7     | 3/71 (4.2%)         | 0/24 (0%)       | 0/23 (0%)       | 3/24 (12.5%)    |
| Number of subjects with 25-OH-D $\geq 30$ ng/ml on Day 14    | 26/71 (36.6%)       | 17/24 (70.8%)   | 4/23 (17.4%)    | 5/24 (20.8%)    |
| Number of subjects with 25-OH-D $\geq 30$ ng/ml on Day 21    | 59/71 (83.1%)       | 22/24 (91.7%)   | 18/23 (78.3%)   | 19/24 (79.2%)   |
| Number of subjects with 25-OH-D $\geq 30$ ng/ml on Day 28    | 66/71 (93%)         | 24/24 (100%)    | 22/23 (95.7%)   | 20/24 (83.3%)   |
| Number of subjects with 25-OH-D $\geq 30$ ng/ml on Day 35    | 70/71 (98.6%)       | 24/24 (100%)    | 23/23 (100%)    | 23/24 (95.8%)   |
| Number of subjects with 25-OH-D $\geq 30$ ng/ml on Day 42    | 70/71 (98.6%)       | 24/24 (100%)    | 23/23 (100%)    | 23/24 (95.8%)   |
| Number of subjects with 25-OH-D $\geq 30$ ng/ml on Day 49    | 70/71 (98.6%)       | 24/24 (100%)    | 23/23 (100%)    | 23/24 (95.8%)   |
| Number of subjects with 25-OH-D $\geq 30$ ng/ml on Day 56    | 71/71 (100%)        | 24/24 (100%)    | 23/23 (100%)    | 24/24 (100%)    |
| Number of subjects with 25-OH-D $\geq 30$ ng/ml on Day 63    | 71/71 (100%)        | 24/24 (100%)    | 23/23 (100%)    | 24/24 (100%)    |
| Number of subjects with 25-OH-D $\geq 30$ ng/ml on Day 77    | 71/71 (100%)        | 24/24 (100%)    | 23/23 (100%)    | 24/24 (100%)    |
| Number of subjects with 25-OH-D $\geq 30$ ng/ml on Day 84    | 71/71 (100%)        | 24/24 (100%)    | 23/23 (100%)    | 24/24 (100%)    |
| Number of subjects with 25-OH-D $\geq 30$ ng/ml on Day 85**  | 67/67 (100%)**      | 24/24 (100%)**  | 21/21 (100%)**  | 22/22 (100%)**  |
| Number of subjects with 25-OH-D $\geq 30$ ng/ml on Day 87**  | 65/67 (97%)**       | 23/24 (95.8%)** | 21/21 (100%)**  | 21/22 (95.5%)** |
| Number of subjects with 25-OH-D $\geq 30$ ng/ml on Day 89**  | 67/67 (100%)**      | 24/24 (100%)**  | 21/21 (100%)**  | 22/22 (100%)**  |
| Number of subjects with 25-OH-D $\geq 30$ ng/ml on Day 96**  | 67/67 (100%)**      | 24/24 (100%)**  | 21/21 (100%)**  | 22/22 (100%)**  |
| Number of subjects with 25-OH-D $\geq 30$ ng/ml on Day 103** | 63/67 (94%)**       | 23/24 (95.8%)** | 20/21 (95.2%)** | 20/22 (90.9%)** |
| Number of subjects with 25-OH-D $\geq 30$ ng/ml on Day 112** | 66/67 (98.5%)**     | 24/24 (100%)**  | 21/21 (100%)**  | 21/22 (95.5%)** |

\* 4 subjects who took a dose on Day 84 (not per-protocol) are excluded from statistics of V14-V19. Percentages computed on 65 (69-4)

\*\* 4 subjects who took a dose on Day 84 (not per-protocol) are excluded from statistics of V14-V19. Percentages computed on 67 (71-4)

**Supplementary Table S3.** Pharmacodynamic parameters over time

| Time                   |              | ALL subjects<br>(n=73) | Group A<br>(n=24) | Group B<br>(n=25) | Group C<br>(n=24) | ANOVA<br>p-value |
|------------------------|--------------|------------------------|-------------------|-------------------|-------------------|------------------|
| <b>Calcium</b>         |              |                        |                   |                   |                   |                  |
| V2                     | N            | 73                     | 24                | 25                | 24                | 0.372            |
|                        | Mean (SD)    | 2.3 (0.1)              | 2.3 (0.1)         | 2.3 (0.1)         | 2.3 (0.1)         |                  |
|                        | Median (IQR) | 2.3 (2.2-2.4)          | 2.3 (2.3-2.4)     | 2.3 (2.2-2.3)     | 2.3 (2.2-2.4)     |                  |
|                        | Min-Max      | 2.2-2.5                | 2.2-2.5           | 2.2-2.4           | 2.2-2.5           |                  |
| V6                     | N            | 73                     | 24                | 25                | 24                | 0.285            |
|                        | Mean (SD)    | 2.3 (0.1)              | 2.3 (0.1)         | 2.3 (0.1)         | 2.3 (0.1)         |                  |
|                        | Median (IQR) | 2.3 (2.3-2.4)          | 2.3 (2.3-2.3)     | 2.3 (2.3-2.4)     | 2.3 (2.3-2.4)     |                  |
|                        | Min-Max      | 2.1-2.5                | 2.1-2.5           | 2.2-2.4           | 2.2-2.5           |                  |
| V10                    | N            | 73                     | 24                | 25                | 24                | 0.956            |
|                        | Mean (SD)    | 2.3 (0.1)              | 2.3 (0.1)         | 2.3 (0.1)         | 2.3 (0.1)         |                  |
|                        | Median (IQR) | 2.3 (2.3-2.4)          | 2.4 (2.3-2.4)     | 2.3 (2.3-2.4)     | 2.3 (2.3-2.4)     |                  |
|                        | Min-Max      | 2.2-2.5                | 2.2-2.5           | 2.2-2.5           | 2.2-2.5           |                  |
| V13                    | N            | 72                     | 24                | 24                | 24                | 0.958            |
|                        | Mean (SD)    | 2.3 (0.1)              | 2.3 (0.1)         | 2.3 (0.1)         | 2.3 (0.1)         |                  |
|                        | Median (IQR) | 2.3 (2.3-2.4)          | 2.3 (2.3-2.4)     | 2.3 (2.3-2.4)     | 2.3 (2.3-2.4)     |                  |
|                        | Min-Max      | 2.1-2.5                | 2.2-2.4           | 2.1-2.5           | 2.2-2.4           |                  |
| V19*                   | N            | 68                     | 23                | 23                | 22                | 0.396            |
|                        | Mean (SD)    | 2.3 (0.1)              | 2.3 (0.1)         | 2.3 (0.1)         | 2.3 (0.1)         |                  |
|                        | Median (IQR) | 2.3 (2.3-2.4)          | 2.3 (2.3-2.3)     | 2.3 (2.2-2.3)     | 2.4 (2.3-2.4)     |                  |
|                        | Min-Max      | 2.2-2.5                | 2.2-2.5           | 2.2-2.5           | 2.2-2.5           |                  |
| <b>Ionized calcium</b> |              |                        |                   |                   |                   |                  |
| V2                     | N            | 73                     | 24                | 25                | 24                | 0.208            |
|                        | Mean (SD)    | 1.2 (0)                | 1.2 (0)           | 1.2 (0)           | 1.2 (0)           |                  |
|                        | Median (IQR) | 1.2 (1.2-1.2)          | 1.2 (1.2-1.3)     | 1.2 (1.2-1.2)     | 1.2 (1.2-1.2)     |                  |
|                        | Min-Max      | 1.2-1.3                | 1.2-1.3           | 1.2-1.3           | 1.2-1.3           |                  |
| V6                     | N            | 72                     | 24                | 24                | 24                | 0.636            |
|                        | Mean (SD)    | 1.2 (0)                | 1.2 (0)           | 1.2 (0)           | 1.2 (0)           |                  |
|                        | Median (IQR) | 1.2 (1.2-1.2)          | 1.2 (1.2-1.2)     | 1.2 (1.2-1.2)     | 1.2 (1.2-1.2)     |                  |
|                        | Min-Max      | 1-1.3                  | 1-1.3             | 1.2-1.3           | 1.2-1.3           |                  |
| V10                    | N            | 73                     | 24                | 25                | 24                | 0.486            |
|                        | Mean (SD)    | 1.2 (0)                | 1.2 (0)           | 1.2 (0)           | 1.2 (0)           |                  |
|                        | Median (IQR) | 1.2 (1.2-1.3)          | 1.2 (1.2-1.3)     | 1.2 (1.2-1.3)     | 1.2 (1.2-1.3)     |                  |
|                        | Min-Max      | 1.2-1.3                | 1.2-1.3           | 1.2-1.3           | 1.2-1.3           |                  |
| V13                    | N            | 72                     | 24                | 24                | 24                | 0.674            |
|                        | Mean (SD)    | 1.2 (0)                | 1.2 (0)           | 1.2 (0)           | 1.2 (0)           |                  |
|                        | Median (IQR) | 1.2 (1.2-1.2)          | 1.2 (1.2-1.2)     | 1.2 (1.2-1.2)     | 1.2 (1.2-1.2)     |                  |
|                        | Min-Max      | 1.2-1.3                | 1.2-1.3           | 1.2-1.3           | 1.2-1.3           |                  |
| V19*                   | N            | 69                     | 24                | 23                | 22                | 0.373            |
|                        | Mean (SD)    | 1.2 (0)                | 1.2 (0)           | 1.2 (0)           | 1.2 (0)           |                  |
|                        | Median (IQR) | 1.2 (1.2-1.2)          | 1.2 (1.2-1.2)     | 1.2 (1.2-1.2)     | 1.2 (1.2-1.2)     |                  |
|                        | Min-Max      | 1.1-1.3                | 1.2-1.3           | 1.2-1.3           | 1.1-1.3           |                  |
| <b>Albumin</b>         |              |                        |                   |                   |                   |                  |
| V2                     | N            | 73                     | 24                | 25                | 24                | 0.323            |
|                        | Mean (SD)    | 44.9 (2.6)             | 45.2 (2.8)        | 44.3 (2.8)        | 45.3 (2.2)        |                  |
|                        | Median (IQR) | 45.3 (43-46.8)         | 45.4 (43.3-47.4)  | 44.2 (42.2-45.8)  | 45.1 (43.4-47.3)  |                  |
|                        | Min-Max      | 40.1-52.6              | 40.3-49.6         | 40.1-52.6         | 42.1-48.9         |                  |
| V6                     | N            | 73                     | 24                | 25                | 24                | 0.427            |
|                        | Mean (SD)    | 45.1 (3)               | 45.4 (4)          | 44.5 (2.6)        | 45.5 (2.1)        |                  |
|                        | Median (IQR) | 45.1 (43-46.6)         | 45.7 (42.1-48.4)  | 44.3 (42.7-46.1)  | 45.3 (44.4-46.8)  |                  |
|                        | Min-Max      | 36.7-52.1              | 36.7-52.1         | 38.7-52           | 42.2-50.1         |                  |
| V10                    | N            | 73                     | 24                | 25                | 24                | 0.354            |
|                        | Mean (SD)    | 45.3 (2.7)             | 46 (2.4)          | 45.1 (2.9)        | 44.9 (2.7)        |                  |
|                        | Median (IQR) | 45.1 (43.4-46.6)       | 46 (43.7-48)      | 44.7 (42.9-46.3)  | 44.7 (43.1-45.3)  |                  |
|                        | Min-Max      | 40.5-53.7              | 41.7-49.9         | 40.6-53.7         | 40.5-51.9         |                  |
| V13                    | N            | 72                     | 24                | 24                | 24                | 0.813            |
|                        | Mean (SD)    | 44.7 (3.1)             | 45 (3.1)          | 44.4 (3.6)        | 44.8 (2.5)        |                  |
|                        | Median (IQR) | 44.8 (42.6-47.2)       | 45 (42.6-47.5)    | 44.9 (42.5-46)    | 44 (42.6-47.1)    |                  |
|                        | Min-Max      | 34.5-52.1              | 38.8-50.2         | 34.5-52.1         | 41.2-48.7         |                  |

|                  |              |                  |                  |                  |                  |       |
|------------------|--------------|------------------|------------------|------------------|------------------|-------|
| V19*             | N            | 69               | 24               | 23               | 22               |       |
|                  | Mean (SD)    | 44.4 (2.6)       | 44.3 (2.3)       | 44.3 (3.4)       | 44.6 (1.9)       | 0.909 |
|                  | Median (IQR) | 44.7 (42.7-45.5) | 44.9 (43.2-45.5) | 43.7 (42.1-45.2) | 44.7 (43.1-45.5) |       |
|                  | Min-Max      | 39-52.6          | 39.2-48.7        | 39-52.6          | 41.6-49.7        |       |
| <b>Phosphate</b> |              |                  |                  |                  |                  |       |
| V2               | N            | 73               | 24               | 25               | 24               |       |
|                  | Mean (SD)    | 1.1 (0.2)        | 1.1 (0.2)        | 1.1 (0.1)        | 1.1 (0.2)        | 0.85  |
|                  | Median (IQR) | 1.1 (1-1.1)      | 1.1 (1-1.2)      | 1.1 (1-1.1)      | 1.1 (1-1.1)      |       |
|                  | Min-Max      | 0.6-1.6          | 0.7-1.5          | 0.9-1.2          | 0.6-1.6          |       |
| V6               | N            | 73               | 24               | 25               | 24               |       |
|                  | Mean (SD)    | 1.1 (0.1)        | 1.1 (0.1)        | 1.1 (0.1)        | 1.1 (0.2)        | 0.503 |
|                  | Median (IQR) | 1.1 (1-1.2)      | 1.1 (1-1.2)      | 1.1 (1-1.2)      | 1.1 (1-1.2)      |       |
|                  | Min-Max      | 0.7-1.5          | 0.9-1.4          | 0.8-1.3          | 0.7-1.5          |       |
| V10              | N            | 73               | 24               | 25               | 24               |       |
|                  | Mean (SD)    | 1.1 (0.2)        | 1.1 (0.2)        | 1.1 (0.1)        | 1.1 (0.2)        | 0.539 |
|                  | Median (IQR) | 1.1 (1-1.2)      | 1.1 (1-1.2)      | 1.1 (1-1.2)      | 1.1 (1-1.2)      |       |
|                  | Min-Max      | 0.7-1.5          | 0.8-1.5          | 0.8-1.4          | 0.7-1.5          |       |
| V13              | N            | 72               | 24               | 24               | 24               |       |
|                  | Mean (SD)    | 1.1 (0.1)        | 1.1 (0.1)        | 1.1 (0.1)        | 1.1 (0.2)        | 0.267 |
|                  | Median (IQR) | 1.1 (1-1.2)      | 1.1 (1-1.2)      | 1.1 (1-1.1)      | 1.1 (1.1-1.2)    |       |
|                  | Min-Max      | 0.7-1.4          | 0.7-1.4          | 0.8-1.3          | 0.7-1.4          |       |
| V19*             | N            | 69               | 24               | 23               | 22               |       |
|                  | Mean (SD)    | 1.1 (0.1)        | 1 (0.1)          | 1.1 (0.1)        | 1.1 (0.2)        | 0.839 |
|                  | Median (IQR) | 1.1 (1-1.1)      | 1 (1-1.1)        | 1 (1-1.1)        | 1.1 (1-1.1)      |       |
|                  | Min-Max      | 0.7-1.4          | 0.9-1.3          | 0.8-1.4          | 0.7-1.4          |       |

**Supplementary Table S4.** Summary of adverse events during the study

|                                                                                                                                                                                                            | All AE (N) | All Subject N (%) | Group A AE (N) | Group A Subject N (%) | Group B AE (N) | Group B Subject N(%) | Group C AE (N) | Group C Subject N (%) |
|------------------------------------------------------------------------------------------------------------------------------------------------------------------------------------------------------------|------------|-------------------|----------------|-----------------------|----------------|----------------------|----------------|-----------------------|
| AEs                                                                                                                                                                                                        | 118        | 49 (65.3)         | 42             | 18 (72)               | 48             | 19 (76)              | 28             | 12 (48)               |
| Mild AEs                                                                                                                                                                                                   | 86         | 38 (50.7)         | 33             | 15 (60)               | 34             | 13 (52)              | 19             | 10 (40)               |
| Moderate AEs                                                                                                                                                                                               | 32         | 25 (33.3)         | 9              | 8 (32)                | 14             | 10 (40)              | 9              | 7 (28)                |
| Severe AEs                                                                                                                                                                                                 | 0          | 0 (0)             | 0              | 0 (0)                 | 0              | 0 (0)                | 0              | 0 (0)                 |
| SAEs                                                                                                                                                                                                       | 0          | 0 (0)             | 0              | 0 (0)                 | 0              | 0 (0)                | 0              | 0 (0)                 |
| IMP-related AEs (certain/probable/possible)                                                                                                                                                                | 1          | 1 (1.3)           | 1              | 1 (4)                 | 0              | 0 (0)                | 0              | 0 (0)                 |
| IMP-not related AEs (no reasonable causal relationship)*                                                                                                                                                   | 117        | 49 (65.3)         | 41             | 18 (72)               | 48             | 19 (76)              | 28             | 12 (48)               |
| AEs leading to withdrawal                                                                                                                                                                                  | 1          | 1 (1.3)           | 1              | 1 (4)                 | 0              | 0 (0)                | 0              | 0 (0)                 |
| <i>IMP: medicinal product (cholecalciferol)</i><br><i>AE n: number of adverse events</i><br><i>Subject n: number of subjects with AE</i><br><i>* considering 'not related' and 'unlikely relationship'</i> |            |                   |                |                       |                |                      |                |                       |
